# Supplementary material for: Confined microemulsions: pore diameter induced change of the phase behavior
Source: Royal Society of Chemistry journal article supplement (doi:10.1039/d4ra01283f), 2024-01-01
Supplement: d4ra01283f1.pdf [file d4ra01283f1.pdf]

## Supporting Information

### Confined Microemulsions: Pore Diameter Induced Change of the Phase Behavior

René Haverkamp,<sup>[a]</sup> Margarethe Dahl,<sup>[b]</sup> Tim Julian Stank,<sup>[a]</sup> Jessica Hübner,<sup>[c]</sup> Peter Strasser,<sup>[c]</sup> Stefan Wellert,<sup>\*[b]</sup> Thomas Hellweg,<sup>\*[a]</sup>

[a] René Haverkamp, Tim Julian Stank, Thomas Hellweg\*, Department of Physical and Biophysical Chemistry, University of Bielefeld, Universitätsstraße 25, Bielefeld, 33615, Germany  
E-mail: thomas.hellweg@uni-bielefeld.de

[b] Margarethe Dahl, Stefan Wellert, Stranski-Laboratorium für Physikalische und Theoretische Chemie, Technical University of Berlin, Straße des 17. Juni 124, Berlin, 10623, Germany  
E-mail: s.wellert@tu-berlin.de

[c] Jessica Hübner, Peter Strasser, Department of Chemistry, Chemical Engineering Division, Technical University of Berlin, Straße des 17. Juni 124, Berlin, 10623, Germany  
E-mail: pstrasser@tu-berlin.de

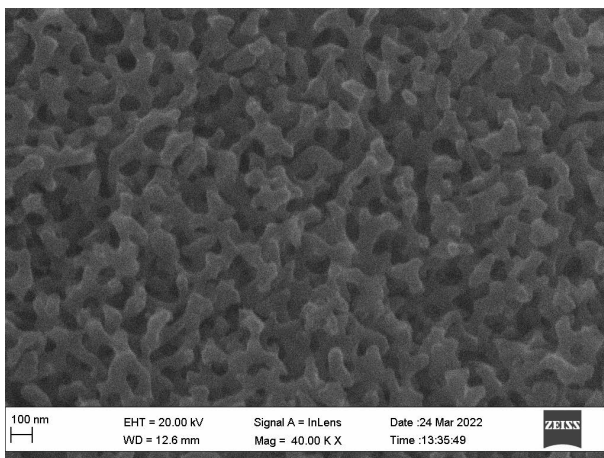

Figure 1: SEM Micrograph of CPG1000.

Table 1: Fit results of the Teubner-Strey model for ME (equation 5),  $d$  is the domain size,  $\xi$ , the correlation length, and  $B$ , a scaling factor.

| T / °C | d / Å | $\xi$ / Å | B    |
|--------|-------|-----------|------|
| 5      | 144   | 153       | 9885 |
| 10     | 163   | 124       | 3235 |
| 15     | 188   | 105       | 2491 |
| 20     | 191   | 97        | 3957 |
| 30     | 184   | 106       | 5197 |
| 35     | 181   | 92        | 3388 |
| 40     | 145   | 72        | 1595 |
| 45     | 120   | 61        | 1000 |
| 50     | 89    | 40        | 317  |
| 55     | 69    | 27        | 100  |

Table 2: Fit parameters of CPG184 (equation 9). The parameters of the Teubner-Strey model are  $d$ , the domain size,  $\xi$ , the correlation length, and  $B$ , a scaling factor. The parameters of the Lozentzian contribution are a scaling parameter  $A$ , the exponent  $n$ , the peak maximum  $q_0$ , and the correlation length  $\xi_L$ . The intensity of the CPG matrix is scaled by the parameter  $C$ .

| T / °C | $d / \text{Å}$ | $\xi / \text{Å}$ | $n$ | $\xi_L / \text{Å}$ | $B$   | $A$ | $C$  | $q_0 / / \text{Å}^{-1}$ |
|--------|----------------|------------------|-----|--------------------|-------|-----|------|-------------------------|
| 5      | 234            | 129              | 4   | 301                | 25199 | 215 | 1.38 | 0.012                   |
| 10     | 231            | 133              | 4   | 301                | 28476 | 292 | 1.43 | 0.012                   |
| 15     | 231            | 146              | 4   | 299                | 39166 | 342 | 1.44 | 0.012                   |
| 20     | 240            | 127              | 4   | 301                | 39297 | 99  | 1.02 | 0.012                   |
| 25     | 244            | 118              | 4   | 301                | 35520 | 127 | 0.89 | 0.012                   |
| 30     | 233            | 117              | 4   | 299                | 31278 | 315 | 0.95 | 0.012                   |
| 35     | 230            | 106              | 4   | 299                | 20511 | 424 | 1.08 | 0.012                   |
| 40     | 230            | 91               | 4   | 301                | 13089 | 91  | 1.04 | 0.012                   |
| 45     | 234            | 102              | 4   | 301                | 14337 | 109 | 1.20 | 0.012                   |
| 50     | 234            | 112              | 4   | 301                | 17271 | 133 | 1.29 | 0.012                   |
| 55     | 236            | 119              | 4   | 301                | 20650 | 122 | 1.29 | 0.012                   |

Table 3: Fit parameters of CPG500 (equation 9). The parameters of the Teubner-Strey model are  $d$ , the domain size,  $\xi$ , the correlation length, and  $B$ , a scaling factor. The parameters of the Lozentzian contribution are a scaling parameter  $A$ , the exponent  $n$ , the peak maximum  $q_0$ , and the correlation length  $\xi_L$ . The intensity of the CPG matrix is scaled by the parameter  $C$ .

| T / °C | $d / \text{Å}$ | $\xi / \text{Å}$ | $n$ | $\xi_L / \text{Å}$ | $B$  | $A$  | $C$  | $q_0 / / \text{Å}^{-1}$ |
|--------|----------------|------------------|-----|--------------------|------|------|------|-------------------------|
| 5      | 154            | 80               | 4   | 299                | 1198 | 648  | 1.05 | 0.012                   |
| 10     | 181            | 95               | 4   | 301                | 2461 | 779  | 1.06 | 0.012                   |
| 15     | 220            | 93               | 4   | 301                | 3066 | 1111 | 1.03 | 0.011                   |
| 20     | 258            | 92               | -   | -                  | 3949 | -    | 0.95 | -                       |
| 25     | 320            | 102              | -   | -                  | 8302 | -    | 0.79 | -                       |
| 30     | 236            | 96               | -   | -                  | 4479 | -    | 0.99 | -                       |
| 35     | 177            | 88               | 4   | 301                | 2453 | 464  | 1.05 | 0.011                   |
| 40     | 147            | 77               | 4   | 301                | 1128 | 408  | 0.95 | 0.011                   |
| 45     | 132            | 62               | 4   | 301                | 487  | 441  | 0.96 | 0.011                   |
| 50     | 129            | 48               | 4   | 301                | 191  | 504  | 0.98 | 0.011                   |
| 55     | 129            | 41               | 4   | 301                | 100  | 572  | 0.98 | 0.011                   |

Table 4: Fit parameters of CPG1000 (equation 9). The parameters of the Teubner-Strey model are  $d$ , the domain size,  $\xi$ , the correlation length, and  $B$ , a scaling factor. The parameters of the Lozentzian contribution are a scaling parameter  $A$ , the exponent  $n$ , the peak maximum  $q_0$ , and the correlation length  $\xi_L$ . The intensity of the CPG matrix is scaled by the parameter  $C$ .

| T / °C | $d / \text{Å}$ | $\xi / \text{Å}$ | $n$ | $\xi_L / \text{Å}$ | $B$  | $A$ | $C$  | $q_0 / \text{Å}^{-1}$ |
|--------|----------------|------------------|-----|--------------------|------|-----|------|-----------------------|
| 5      | 139            | 125              | -   | -                  | 2701 | -   | 0.92 | -                     |
| 10     | 167            | 140              | -   | -                  | 4877 | -   | 1.00 | -                     |
| 15     | 204            | 129              | -   | -                  | 5703 | -   | 1.08 | -                     |
| 20     | 246            | 110              | -   | -                  | 4952 | -   | 0.97 | -                     |
| 25     | 247            | 133              | -   | -                  | 8915 | -   | 0.98 | -                     |
| 30     | 214            | 114              | -   | -                  | 4979 | -   | 1.07 | -                     |
| 35     | 168            | 95               | -   | -                  | 2307 | -   | 1.14 | -                     |
| 40     | 140            | 77               | -   | -                  | 1025 | -   | 1.19 | -                     |
| 45     | 120            | 64               | -   | -                  | 603  | -   | 1.19 | -                     |
| 50     | 108            | 54               | -   | -                  | 293  | -   | 1.21 | -                     |
| 55     | 98             | 46               | -   | -                  | 142  | -   | 1.18 | -                     |
